# Supplementary material
Source: publisher figshare collection journal article supplement (https://plos.figshare.com/articles/dataset/_/698720)
Supplement: Supplementary file 1 [file 1]

Archive with 15 entries (15 files):
- Figure_S1.tif
- Figure_S2.tif
- Figure_S3.tif
- Figure_S4.tif
- Figure_S5.tif
- Figure_S6.tif
- Table_S1.pdf
- Table_S2.pdf
- Table_S3.pdf
- Table_S4.pdf
- Table_S5.pdf
- Table_S6.pdf
- Table_S7.pdf
- Table_S8.pdf
- Text_S1.doc
