# Supplementary material
Source: publisher figshare collection journal article supplement (https://plos.figshare.com/articles/dataset/_/698720)
Supplement: Supplementary file 1 [file 1 › Table_S1.pdf]

**Table S1: Descriptive statistics for the 2010 MLSFH study population, and comparison of the MLSFH and the IHS3 (rural) sample characteristics**

|                                                      | 45–64      |       |              |       | 65+        |       |              |       |
|------------------------------------------------------|------------|-------|--------------|-------|------------|-------|--------------|-------|
|                                                      | MLSFH 2010 |       | IHS3 2010–11 |       | MLSFH 2010 |       | IHS3 2010–11 |       |
|                                                      | N          | %     | N            | %     | N          | %     | N            | %     |
| <b>Demographic and Socioeconomic Characteristics</b> |            |       |              |       |            |       |              |       |
| Male                                                 | 327        | 44.7% | 1,924        | 48.1% | 151        | 46.9% | 785          | 43.2% |
| Any education                                        | 522        | 71.4% | 2,483        | 62.1% | 198        | 61.5% | 745          | 41.0% |
| Married                                              | 605        | 83.4% | 3,071        | 76.8% | 192        | 60.8% | 914          | 50.3% |
| Religion                                             |            |       |              |       |            |       |              |       |
| <i>Christian</i>                                     | 447        | 61.2% | 3,319        | 83.0% | 184        | 60.5% | 1,418        | 78.0% |
| <i>Muslim</i>                                        | 156        | 21.4% | 441          | 11.0% | 82         | 27.0% | 241          | 13.3% |
| <i>Other</i>                                         | 134        | 18.4% | 241          | 6.0%  | 47         | 15.5% | 158          | 8.7%  |
| Metal/tile roof                                      | 184        | 25.4% | 1,253        | 31.3% | 85         | 26.9% | 537          | 29.6% |
| <b>Health Indicators</b>                             |            |       |              |       |            |       |              |       |
| Functional limitations and disability state          |            |       |              |       |            |       |              |       |
| Moderate Limitation                                  | 239        | 32.7% | –            | –     | 142        | 44.1% | –            | –     |
| Severe Limitation                                    | 64         | 8.8%  | –            | –     | 93         | 28.9% | –            | –     |
| ADL disabled                                         | –          | –     | 783          | 19.6% | –          | –     | 895          | 49.3% |
| Average Age (45+)                                    | 61.0       |       | 59.8         |       |            |       |              |       |
| Total                                                | 731        |       | 4,001        |       | 322        |       | 1,817        |       |

*Notes:*

(1) IHS3 data description: The Integrated Household Survey is one of the primary instruments implemented by the Government of Malawi through the National Statistical Office (NSO) roughly every 5 years to monitor and evaluate the changing conditions of Malawian households. The IHS data have, among other insights, provided benchmark poverty and vulnerability indicators to foster evidence-based policy formulation and monitor the progress of meeting the Millennium Development Goals (MDGs) as well as the goals listed as part of the Malawi Growth and Development Strategy (MGDS). The Third Integrated Household Survey (IHS3) was conducted by National Statistical Office (NSO) in March 2010–March 2011 [57]. A stratified two-stage sample design was used for the IHS3. The IHS3 sampling frame is based on the listing information and cartography from the 2008 Malawi Population and Housing Census (PHC); includes the three major regions of Malawi, namely North, Center and South; and is stratified into rural and urban strata. The rural subsample of the IHS3, which is used for the above analyses, includes residents from each of the 27 districts of Malawi, except those living in the urban centers of Lilongwe City, Blantyre City, Mzuzu City, and the Municipality of Zomba, and except for residents of the island of Likoma on Lake Malawi. The sampling frame excludes the population living in institutions, such as hospitals, prisons and military barracks.

(2) Health indicators: There are no directly comparable disability/health indicators in the MLSFH and IHS3. Functional limitations and disability states for the MLSFH are defined as follows: respondents who answered “somewhat limited” on either of the two MLSFH SF-12 question about physical limitations are classified as *moderately limited*, and respondents who answered “limited a lot” on either question are classified as *severely limited* (see text for a detailed description). *ADL disabled* in the IHS3 is defined as having difficulty in any one of the following five activities of daily living (ADLs): Seeing, hearing, walking, remembering/concentrating, self-care (bathing/dressing).

(3) Comparisons between the IHS3 and the MLSFH are based on IHS3 and the MLSFH unweighted samples. All differences between the MLSFH and IHS3, except for the proportion male for 45–64 and 65+ and proportion with a metal/tile roof above 65+, are significant ( $p < .05$ ) according to chi-square tests.
