# Supplementary material
Source: publisher figshare collection journal article supplement (https://plos.figshare.com/articles/dataset/_/698720)
Supplement: Supplementary file 1 [file 1 › Table_S2.pdf]

**Table S2: Regression analyses for associations between disability states and income earned, pain inference with work, dissatisfaction with life, and hours worked on farm**

| <b>Logistic Regressions</b>                             | Odds Ratio | S.E. | $\chi^2$ | Pr > $\chi^2$ |
|---------------------------------------------------------|------------|------|----------|---------------|
| <i><b>Do something to earn income in past week</b></i>  |            |      |          |               |
| Healthy (ref.)                                          | 1.00       | –    | –        | –             |
| Mod. Limited                                            | 0.95       | 0.08 | 0.10     | 0.76          |
| Sev. Limited                                            | 0.49       | 0.13 | 7.62     | 0.01          |
| <i><b>Pain interfered with work in past 4 weeks</b></i> |            |      |          |               |
| Healthy (ref.)                                          | 1.00       | –    | –        | –             |
| Mod. Limited                                            | 4.93       | 0.08 | 89.67    | <.001         |
| Sev. Limited                                            | 11.76      | 0.15 | 65.49    | <.001         |
| <i><b>Somewhat/very unsatisfied with life</b></i>       |            |      |          |               |
| Healthy (ref.)                                          | 1.00       | –    | –        | –             |
| Mod. Limited                                            | 2.55       | 0.13 | 13.40    | <.001         |
| Sev. Limited                                            | 8.88       | 0.17 | 40.90    | <.001         |
| <b>OLS Regression</b>                                   | Estimate   | S.E. | $t$      | Pr > $ t $    |
| <i><b>Hours Worked on Own Farm in Past Week</b></i>     |            |      |          |               |
| Healthy (ref.)                                          | –          | –    | –        | –             |
| Mod. Limited                                            | -0.96      | 1.20 | 0.80     | 0.42          |
| Sev. Limited                                            | -5.32      | 1.71 | 3.11     | <.001         |

*Notes:* Estimates control for age, age2, and gender and account for clustering of standard errors at region and village levels.
