# Supplementary material
Source: publisher figshare collection journal article supplement (https://plos.figshare.com/articles/dataset/_/698720)
Supplement: Supplementary file 1 [file 1 › Table_S3.pdf]

**Table S3: Distribution of observed transitions between disability states (healthy/moderately limited//severely limited) during 2006–2010 (3 MLSFH waves)**

| <b>Observed distribution among disability states (healthy/moderately limited/severely limited) and death</b> | <b>Number of transitions</b> | <b>% among all transitions</b> |
|--------------------------------------------------------------------------------------------------------------|------------------------------|--------------------------------|
| Healthy at both interviews                                                                                   | 682                          | 41.5%                          |
| Healthy to moderately limited                                                                                | 283                          | 17.2%                          |
| Healthy to severely limited                                                                                  | 72                           | 4.4%                           |
| Healthy to dead                                                                                              | 30                           | 1.8%                           |
| Moderately limited to healthy                                                                                | 180                          | 10.9%                          |
| Moderately limited at both interviews                                                                        | 171                          | 10.4%                          |
| Moderately limited to severely limited                                                                       | 61                           | 3.7%                           |
| Moderately limited to dead                                                                                   | 29                           | 1.8%                           |
| Severely limited to healthy                                                                                  | 21                           | 1.3%                           |
| Severely limited to moderately limited                                                                       | 43                           | 2.6%                           |
| Severely limited at both interviews                                                                          | 55                           | 3.3%                           |
| Severely limited to dead                                                                                     | 18                           | 1.1%                           |
| Total                                                                                                        | 1645                         | 100%                           |

*Notes:* See text for definition of disability states; transitions are estimated from all individuals that are observed for at least 2 MLSFH rounds during 2006–10. See also Figure 2 describing the MLSFH study population for these analyses.
