# Supplementary material
Source: publisher figshare collection journal article supplement (https://plos.figshare.com/articles/dataset/_/698720)
Supplement: Supplementary file 1 [file 1 › Table_S4.pdf]

**Table S4: Initial gender and functional status distribution for the synthetic cohorts ( $N = 100,000$ ) used in the microsimulation as based on the MLSFH**

|                    | Age 45       |       | Age 55       |       | Age 65       |       | Age 75       |       |
|--------------------|--------------|-------|--------------|-------|--------------|-------|--------------|-------|
|                    | N<br>(MLSFH) | %     | N<br>(MLSFH) | %     | N<br>(MLSFH) | %     | N<br>(MLSFH) | %     |
| Female             | 673          | 55.1% | 432          | 49.2% | 211          | 48.2% | 131          | 55.3% |
| Healthy            | 427          | 63.4% | 205          | 47.5% | 59           | 28.0% | 31           | 23.7% |
| Moderately limited | 199          | 29.6% | 174          | 40.3% | 97           | 46.0% | 56           | 42.7% |
| Severely limited   | 47           | 7.0%  | 53           | 12.3% | 55           | 26.1% | 44           | 33.6% |
| Male               | 548          | 44.9% | 446          | 50.8% | 227          | 51.8% | 106          | 44.7% |
| Healthy            | 451          | 82.3% | 309          | 69.3% | 123          | 54.2% | 28           | 26.4% |
| Moderately limited | 86           | 15.7% | 112          | 25.1% | 71           | 31.3% | 46           | 43.4% |
| Severely limited   | 11           | 2.0%  | 25           | 5.6%  | 33           | 14.5% | 32           | 30.2% |

*Notes:* The distribution of disability states (healthy/moderately limited/severely limited) is within each gender, while the gender distribution is the fraction male (female) in the synthetic cohort. The synthetic cohort has a size of 100,000, and the  $N$  reported in the above table pertains to the MLSFH. Gender and functional limitation distributions are estimated from the MLSFH based on 10-year age intervals, that is, the sex and disability apportionment of the microsimulation cohort of 45-year-olds is based on the sex and limitation characteristics of individuals 45–54 in the MLSFH analysis sample.
