# Supplementary material
Source: publisher figshare collection journal article supplement (https://plos.figshare.com/articles/dataset/_/698720)
Supplement: Supplementary file 1 [file 1 › Table_S6.pdf]

**Table S6: Microsimulation-estimated average remaining life expectancy (LE) at ages 45–75, by sex, using a 2-level classification of disability (healthy vs. limited)**

| <b>Age</b>             | <b>45</b>    |                      | <b>55</b>    |                      |
|------------------------|--------------|----------------------|--------------|----------------------|
|                        | <b>LE</b>    | <b>95% CI</b>        | <b>LE</b>    | <b>95% CI</b>        |
| <b>Female</b>          |              |                      |              |                      |
| <b>Life Expectancy</b> | <b>27.47</b> | <b>(24.54–30.43)</b> | <b>20.83</b> | <b>(18.33–22.87)</b> |
| Healthy                | <b>14.56</b> | <b>(12.99–15.92)</b> | <b>8.95</b>  | <b>(7.63–10.10)</b>  |
| Limited                | <b>12.91</b> | <b>(11.00–14.85)</b> | <b>11.88</b> | <b>(10.07–13.82)</b> |
| <b>Male</b>            |              |                      |              |                      |
| <b>Life Expectancy</b> | <b>25.03</b> | <b>(22.02–28.23)</b> | <b>19.06</b> | <b>(16.44–21.34)</b> |
| Healthy                | <b>16.24</b> | <b>(14.61–18.32)</b> | <b>10.65</b> | <b>(9.24–12.05)</b>  |
| Limited                | <b>8.79</b>  | <b>(6.76–10.77)</b>  | <b>8.41</b>  | <b>(6.70–10.43)</b>  |
| <b>Age</b>             | <b>65</b>    |                      | <b>75</b>    |                      |
|                        | <b>LE</b>    | <b>95% CI</b>        | <b>LE</b>    | <b>95% CI</b>        |
| <b>Female</b>          |              |                      |              |                      |
| <b>Life Expectancy</b> | <b>14.61</b> | <b>(13.01–16.29)</b> | <b>8.72</b>  | <b>(8.09–9.94)</b>   |
| Healthy                | <b>4.54</b>  | <b>(3.50–5.62)</b>   | <b>2.62</b>  | <b>(1.98–3.64)</b>   |
| Limited                | <b>10.07</b> | <b>(8.71–11.91)</b>  | <b>6.11</b>  | <b>(5.45–7.61)</b>   |
| <b>Male</b>            |              |                      |              |                      |
| <b>Life Expectancy</b> | <b>13.55</b> | <b>(11.57–15.73)</b> | <b>8.22</b>  | <b>(7.36–9.49)</b>   |
| Healthy                | <b>6.06</b>  | <b>(4.80–7.21)</b>   | <b>3.50</b>  | <b>(2.74–4.21)</b>   |
| Limited                | <b>7.49</b>  | <b>(6.24–9.36)</b>   | <b>4.72</b>  | <b>(3.97–5.90)</b>   |

*Notes:* Estimates were obtained from synthetic cohorts of 100,000 45-, 55-, 65-, and 75-year olds created via microsimulation, based on the observed transition rates from 2006–2010 MLSFH data. Disability classification is based on MLSFH questions (i) “Do you have any health problems that limit you in carrying out moderate activities?” and (ii) “Do you have any health problems that limit you in carrying out strenuous activities?”, with each question providing a list of moderate/strenuous activities and response categories being “not limited”, “limited a little” and “limited a lot”. Individuals who indicate that they had no functional limitations in either set of activities are classified as *healthy*, those who respond “limited a lot” or “limited a little” on *moderate activities* or “limited a lot” on *strenuous activities* are classified as *limited*.
