# Supplementary material
Source: publisher figshare collection journal article supplement (https://plos.figshare.com/articles/dataset/_/698720)
Supplement: Supplementary file 1 [file 1 › Table_S7.pdf]

**Table S7: Microsimulation-estimated average remaining life expectancy (LE) at ages 45–75, by sex, using a classification of disability based on pain interfering with daily work activities**

| Age                    | 45           |               | 55           |               |
|------------------------|--------------|---------------|--------------|---------------|
|                        | LE           | 95% CI        | LE           | 95% CI        |
| <b>Female</b>          |              |               |              |               |
| <b>Life Expectancy</b> | <b>27.44</b> | (24.66–38.47) | <b>22.17</b> | (18.74–34.91) |
| Healthy                | <b>9.75</b>  | (8.50–13.21)  | <b>6.40</b>  | (4.83–9.56)   |
| Mod. Limited           | <b>11.80</b> | (10.11–17.28) | <b>9.61</b>  | (7.90–15.63)  |
| Sev. Limited           | <b>5.88</b>  | (5.04–8.45)   | <b>6.08</b>  | (4.78–9.41)   |
| <b>Male</b>            |              |               |              |               |
| <b>Life Expectancy</b> | <b>25.75</b> | (23.01–31.76) | <b>20.62</b> | (17.58–27.28) |
| Healthy                | <b>13.02</b> | (11.43–15.37) | <b>9.07</b>  | (7.47–11.49)  |
| Mod. Limited           | <b>9.24</b>  | (7.65–12.63)  | <b>7.95</b>  | (6.46–10.79)  |
| Sev. Limited           | <b>3.49</b>  | (2.49–5.04)   | <b>3.57</b>  | (2.51–5.43)   |
| Age                    | 65           |               | 75           |               |
|                        | LE           | 95% CI        | LE           | 95% CI        |
| <b>Female</b>          |              |               |              |               |
| <b>Life Expectancy</b> | <b>14.50</b> | (13.18–27.81) | <b>8.55</b>  | (8.12–16.61)  |
| Healthy                | <b>3.40</b>  | (2.49–6.23)   | <b>1.70</b>  | (1.16–2.91)   |
| Mod. Limited           | <b>6.39</b>  | (5.33–13.12)  | <b>3.68</b>  | (2.93–7.42)   |
| Sev. Limited           | <b>4.71</b>  | (4.07–8.39)   | <b>3.18</b>  | (2.82–5.81)   |
| <b>Male</b>            |              |               |              |               |
| <b>Life Expectancy</b> | <b>14.07</b> | (12.44–22.00) | <b>8.32</b>  | (7.61–15.09)  |
| Healthy                | <b>5.51</b>  | (4.44–8.02)   | <b>2.58</b>  | (1.77–4.13)   |
| Mod. Limited           | <b>5.44</b>  | (4.45–9.46)   | <b>3.47</b>  | (2.77–6.98)   |
| Sev. Limited           | <b>3.13</b>  | (2.40–4.91)   | <b>2.26</b>  | (1.71–3.9)    |

*Notes:* Estimates were obtained from synthetic cohorts of 100,000 45-, 55-, 65-, and 75-year olds created via microsimulation, based on the observed transition rates from 2006-2010 MLSFH data. Disability classification is based on the MLSFH question “During the past 4 weeks, how much did pain interfere with your normal work (including both work outside the home and housework)?” Individuals who reported no limitations on work caused by pain in the past 4 weeks are categorized as *healthy*, individuals who report “a little bit” or “moderate” limitation are categorized as *moderately limited*, individuals reporting that pain limited their work activities “quite a bit” or “extremely” are categorized as *severely limited*.
