# Supplementary material
Source: publisher figshare collection journal article supplement (https://plos.figshare.com/articles/dataset/_/698720)
Supplement: Supplementary file 1 [file 1 › Table_S8.pdf]

**Table S8: MLSFH Study Population 1998–2010**

|                       | 1998  | 2001  | 2004  |
|-----------------------|-------|-------|-------|
| Number of respondents | 2,602 | 2,548 | 3,298 |
| Age range (females)   | 15–49 | 18–52 | 15–55 |
| HIV prevalence        | —     | —     | 6.4%  |
| Attrition rate        | —     | 14.9% | 21.6% |
| Attrition due to:     |       |       |       |
| –migration            | —     | 75.6% | 58.4% |
| –mortality            | —     | 13.0% | 10.4% |
| –other factors        | —     | 11.4% | 31.2% |
|                       | 2006  | 2008  | 2010  |
| Number of respondents | 3,669 | 4,052 | 3,790 |
| Age range (females)   | 17–57 | 17–92 | 20–89 |
| HIV prevalence        | 7.4%  | 8.9%  | —     |
| Attrition rate        | 19.8% | 23.6% | 25.6% |
| Attrition due to:     |       |       |       |
| –migration            | 62.5% | 57.9% | 56.0% |
| –mortality            | 6.3%  | 7.5%  | 8.8%  |
| –other factors        | 31.2% | 34.6% | 35.0% |

*Notes:* Number of respondents is the number of successfully completed MLSFH survey interviews. HIV prevalence in this table is calculated by starting with all HIV positive respondents in the current wave and imputing HIV positive respondents from a prior wave if the HIV positive respondent didn't accept HIV testing in the current wave. HIV positive respondents are significantly more likely to refuse HIV testing in future waves. The attrition rate is the percentage of MLSFH respondents who were successfully interviewed in the previous wave but not interviewed in the current wave. Migration is the most common reason for attrition among MLSFH respondents.
