# Supplementary material
Source: publisher figshare collection journal article supplement (https://plos.figshare.com/articles/dataset/_/698720)

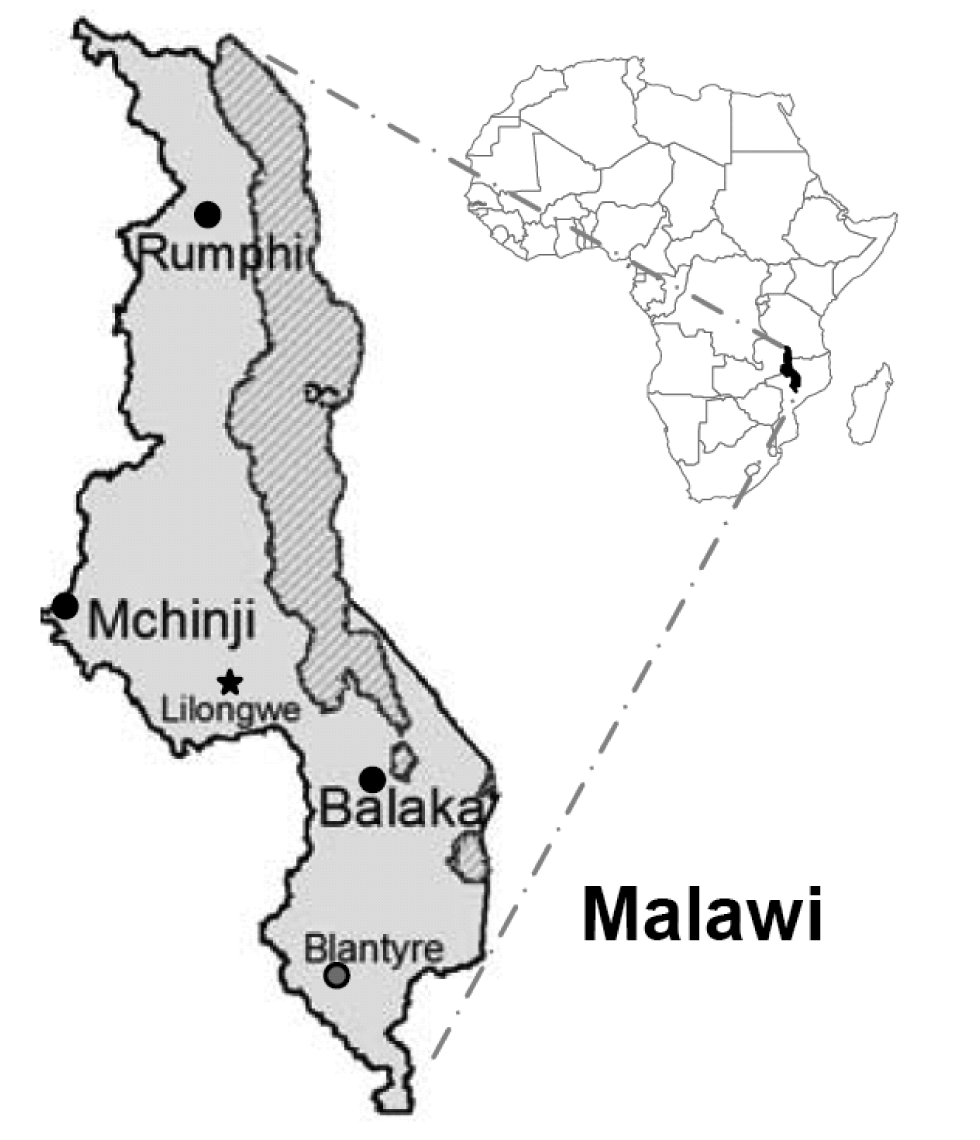

Supplement: Supplementary file 1 [file 1 › Figure_S1.tif]

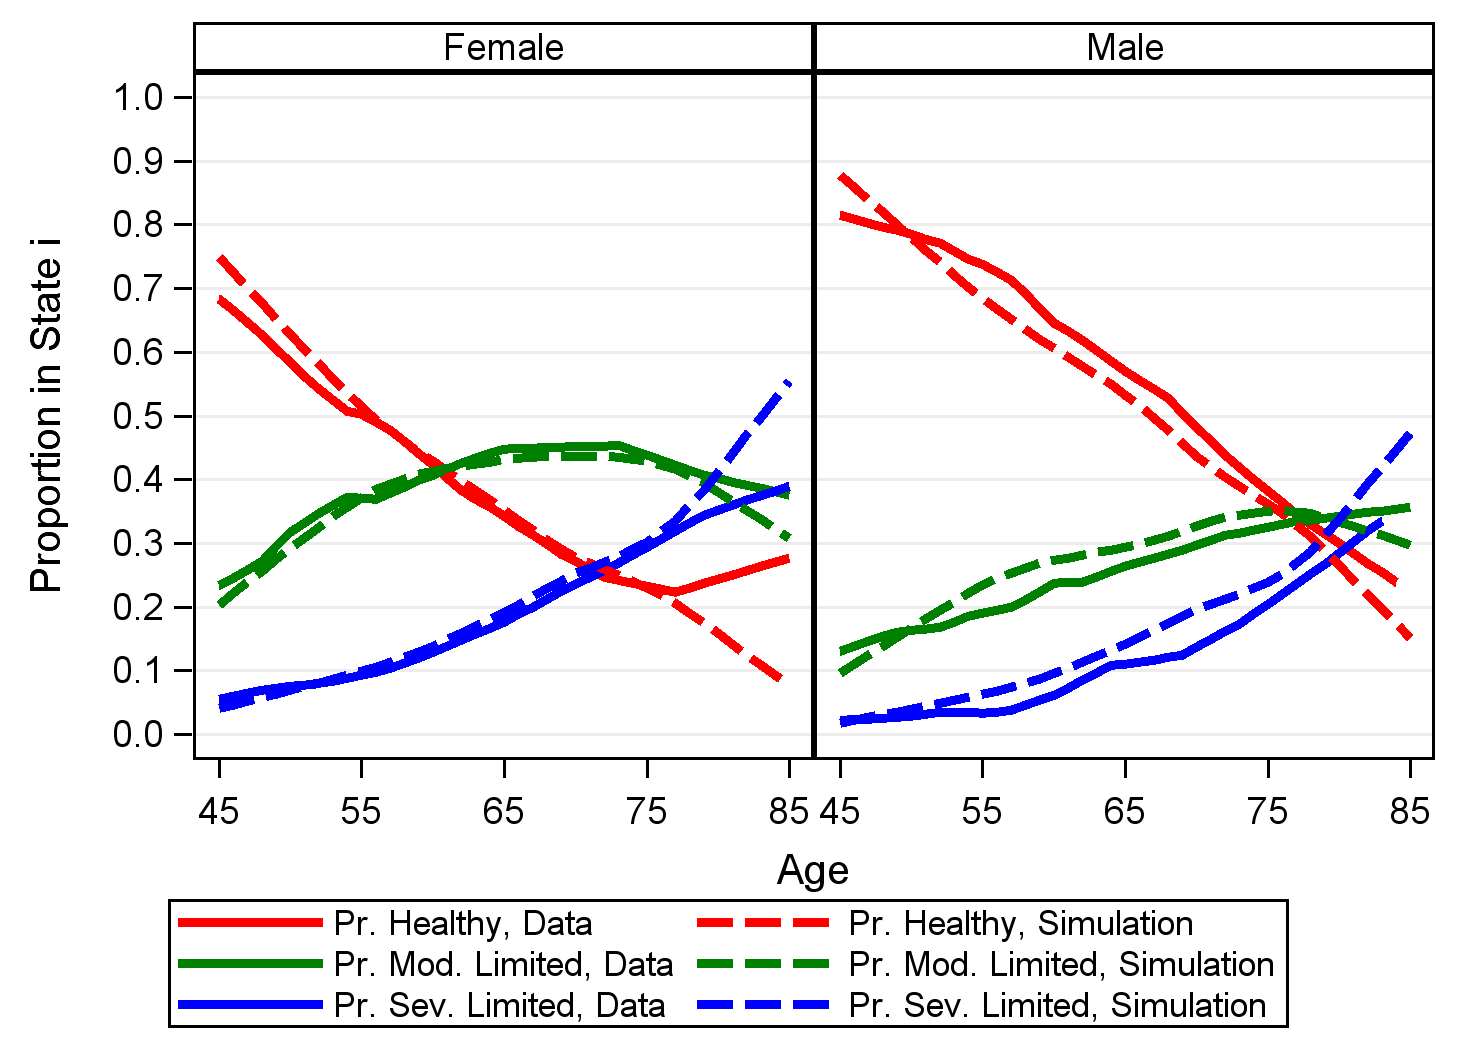

Supplement: Supplementary file 1 [file 1 › Figure_S2.tif]

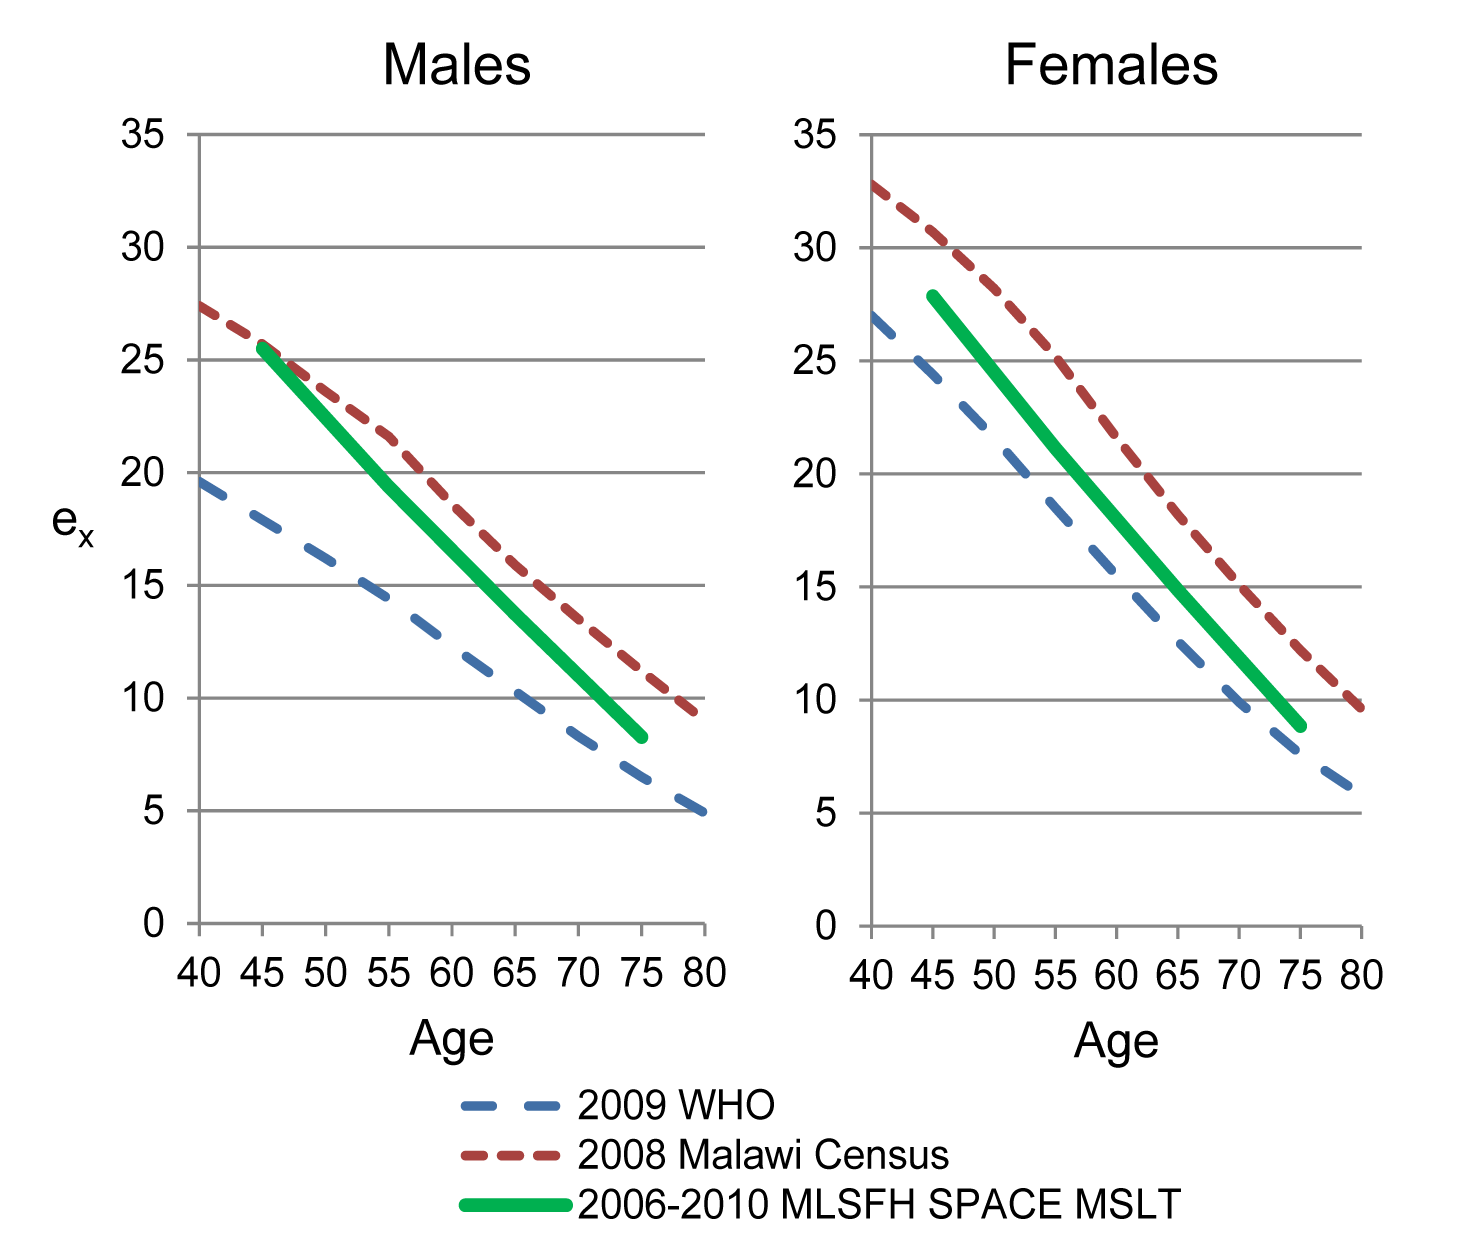

Supplement: Supplementary file 1 [file 1 › Figure_S3.tif]

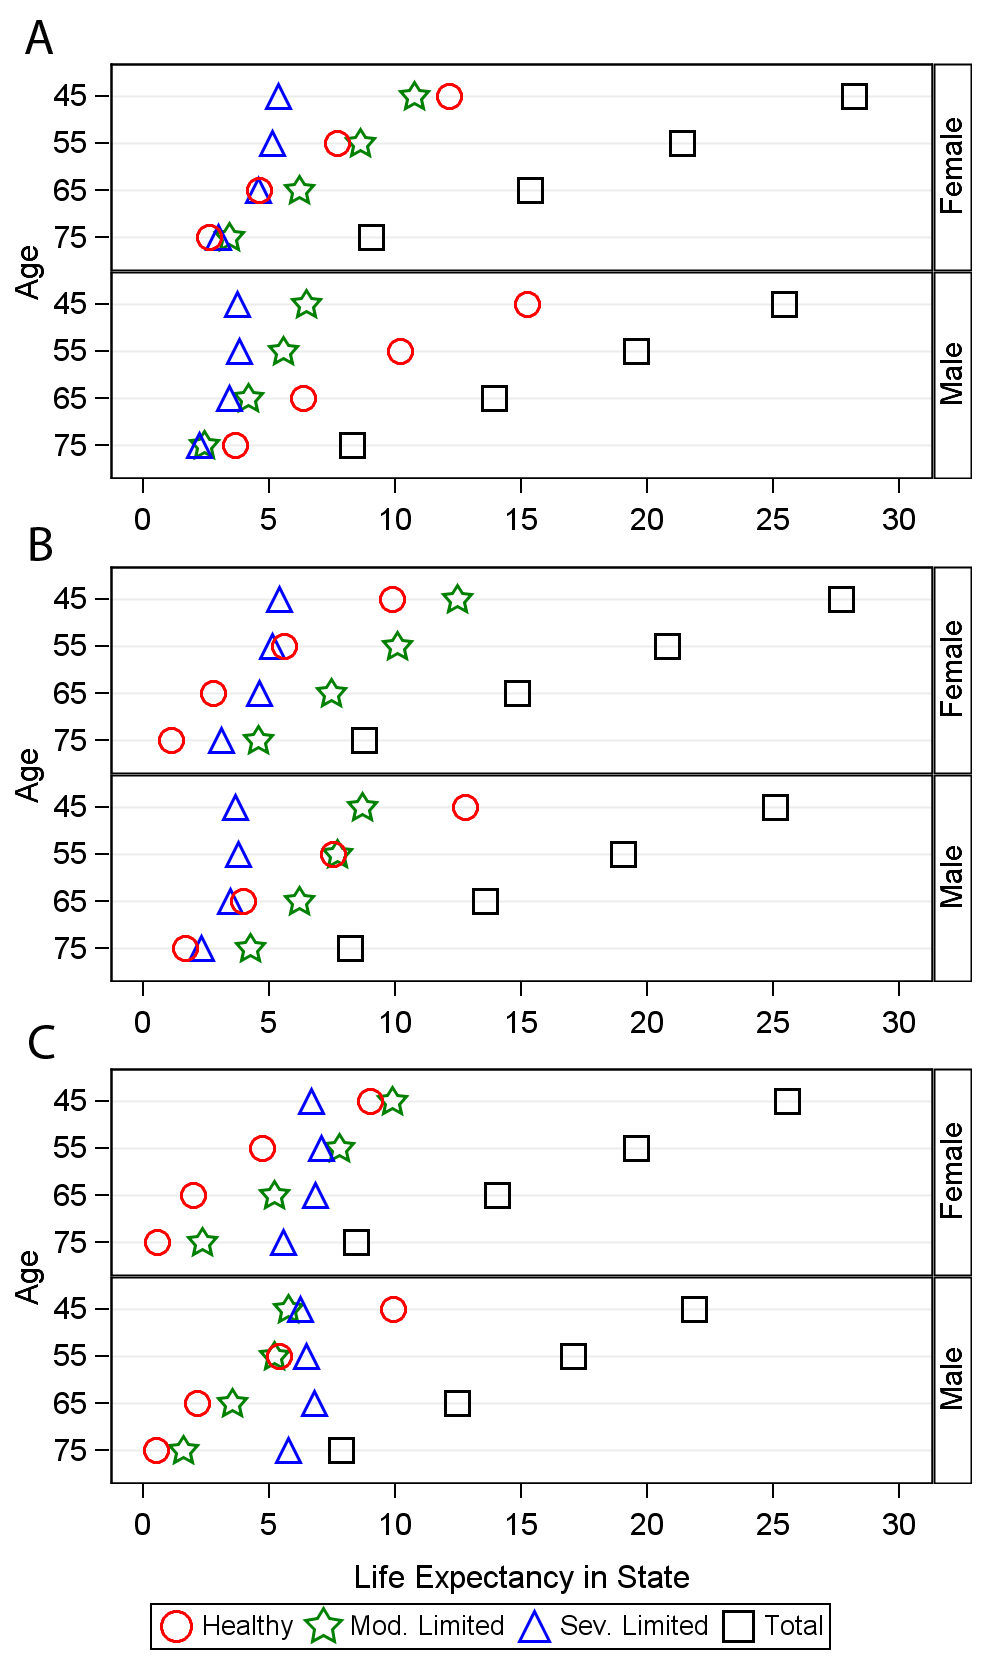

Supplement: Supplementary file 1 [file 1 › Figure_S4.tif]

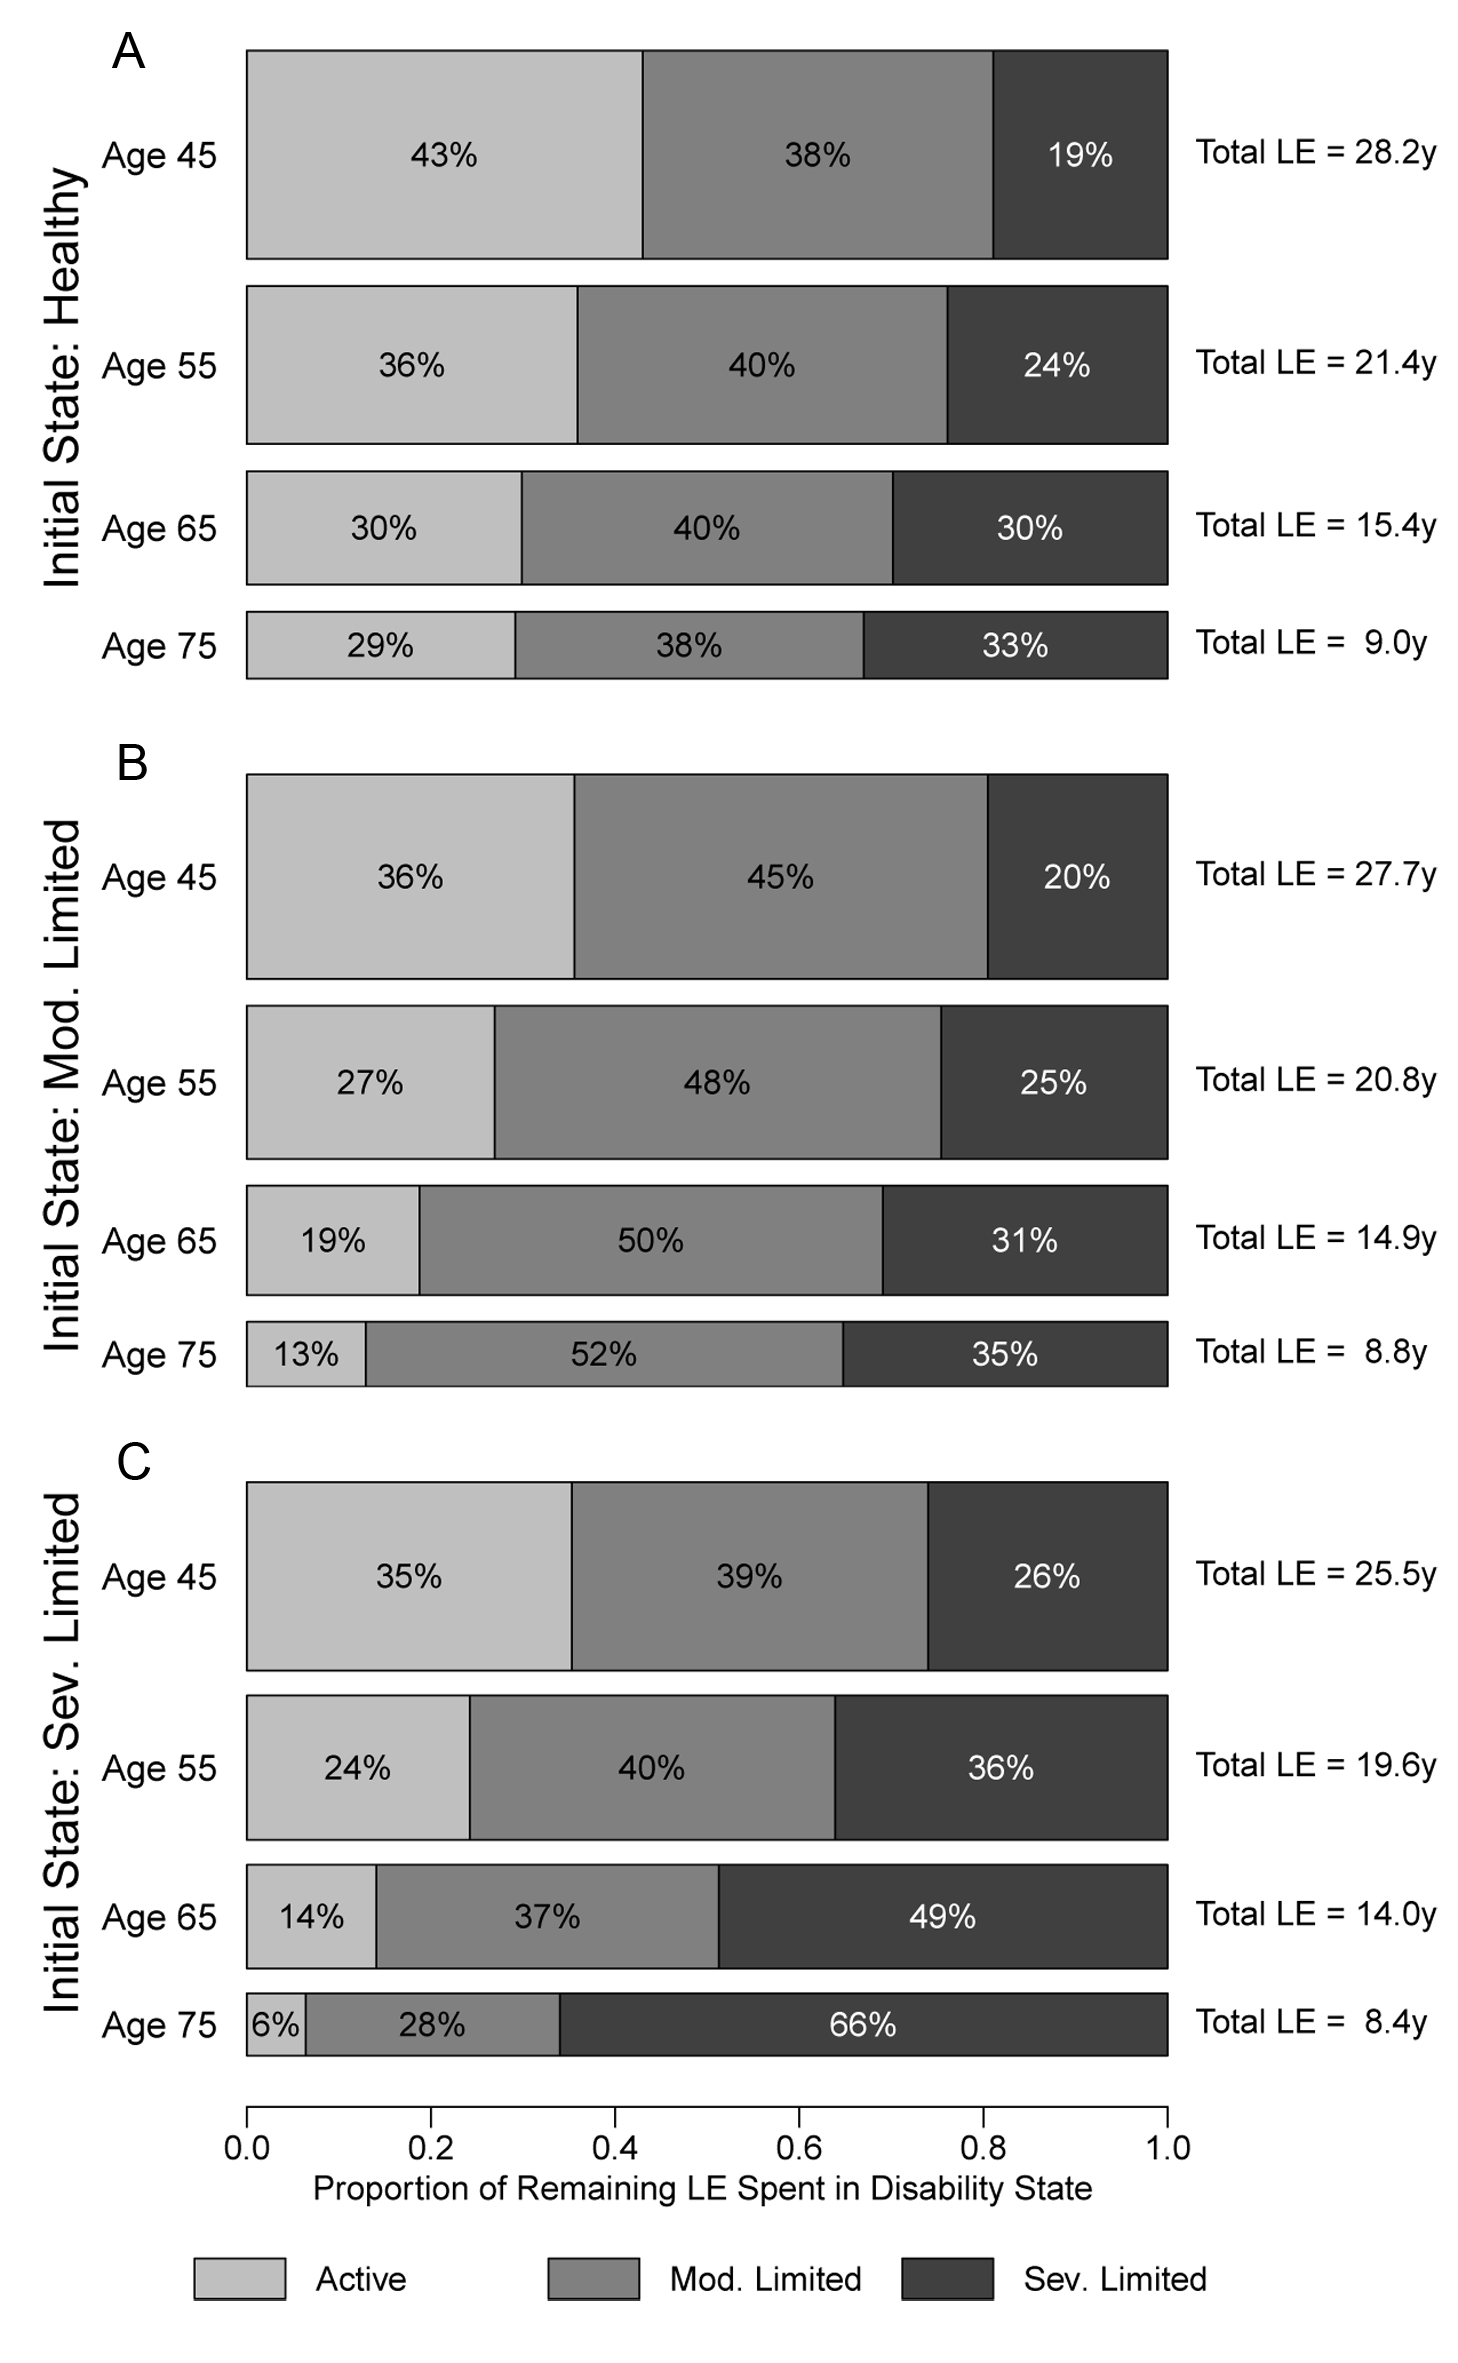

Supplement: Supplementary file 1 [file 1 › Figure_S5.tif]

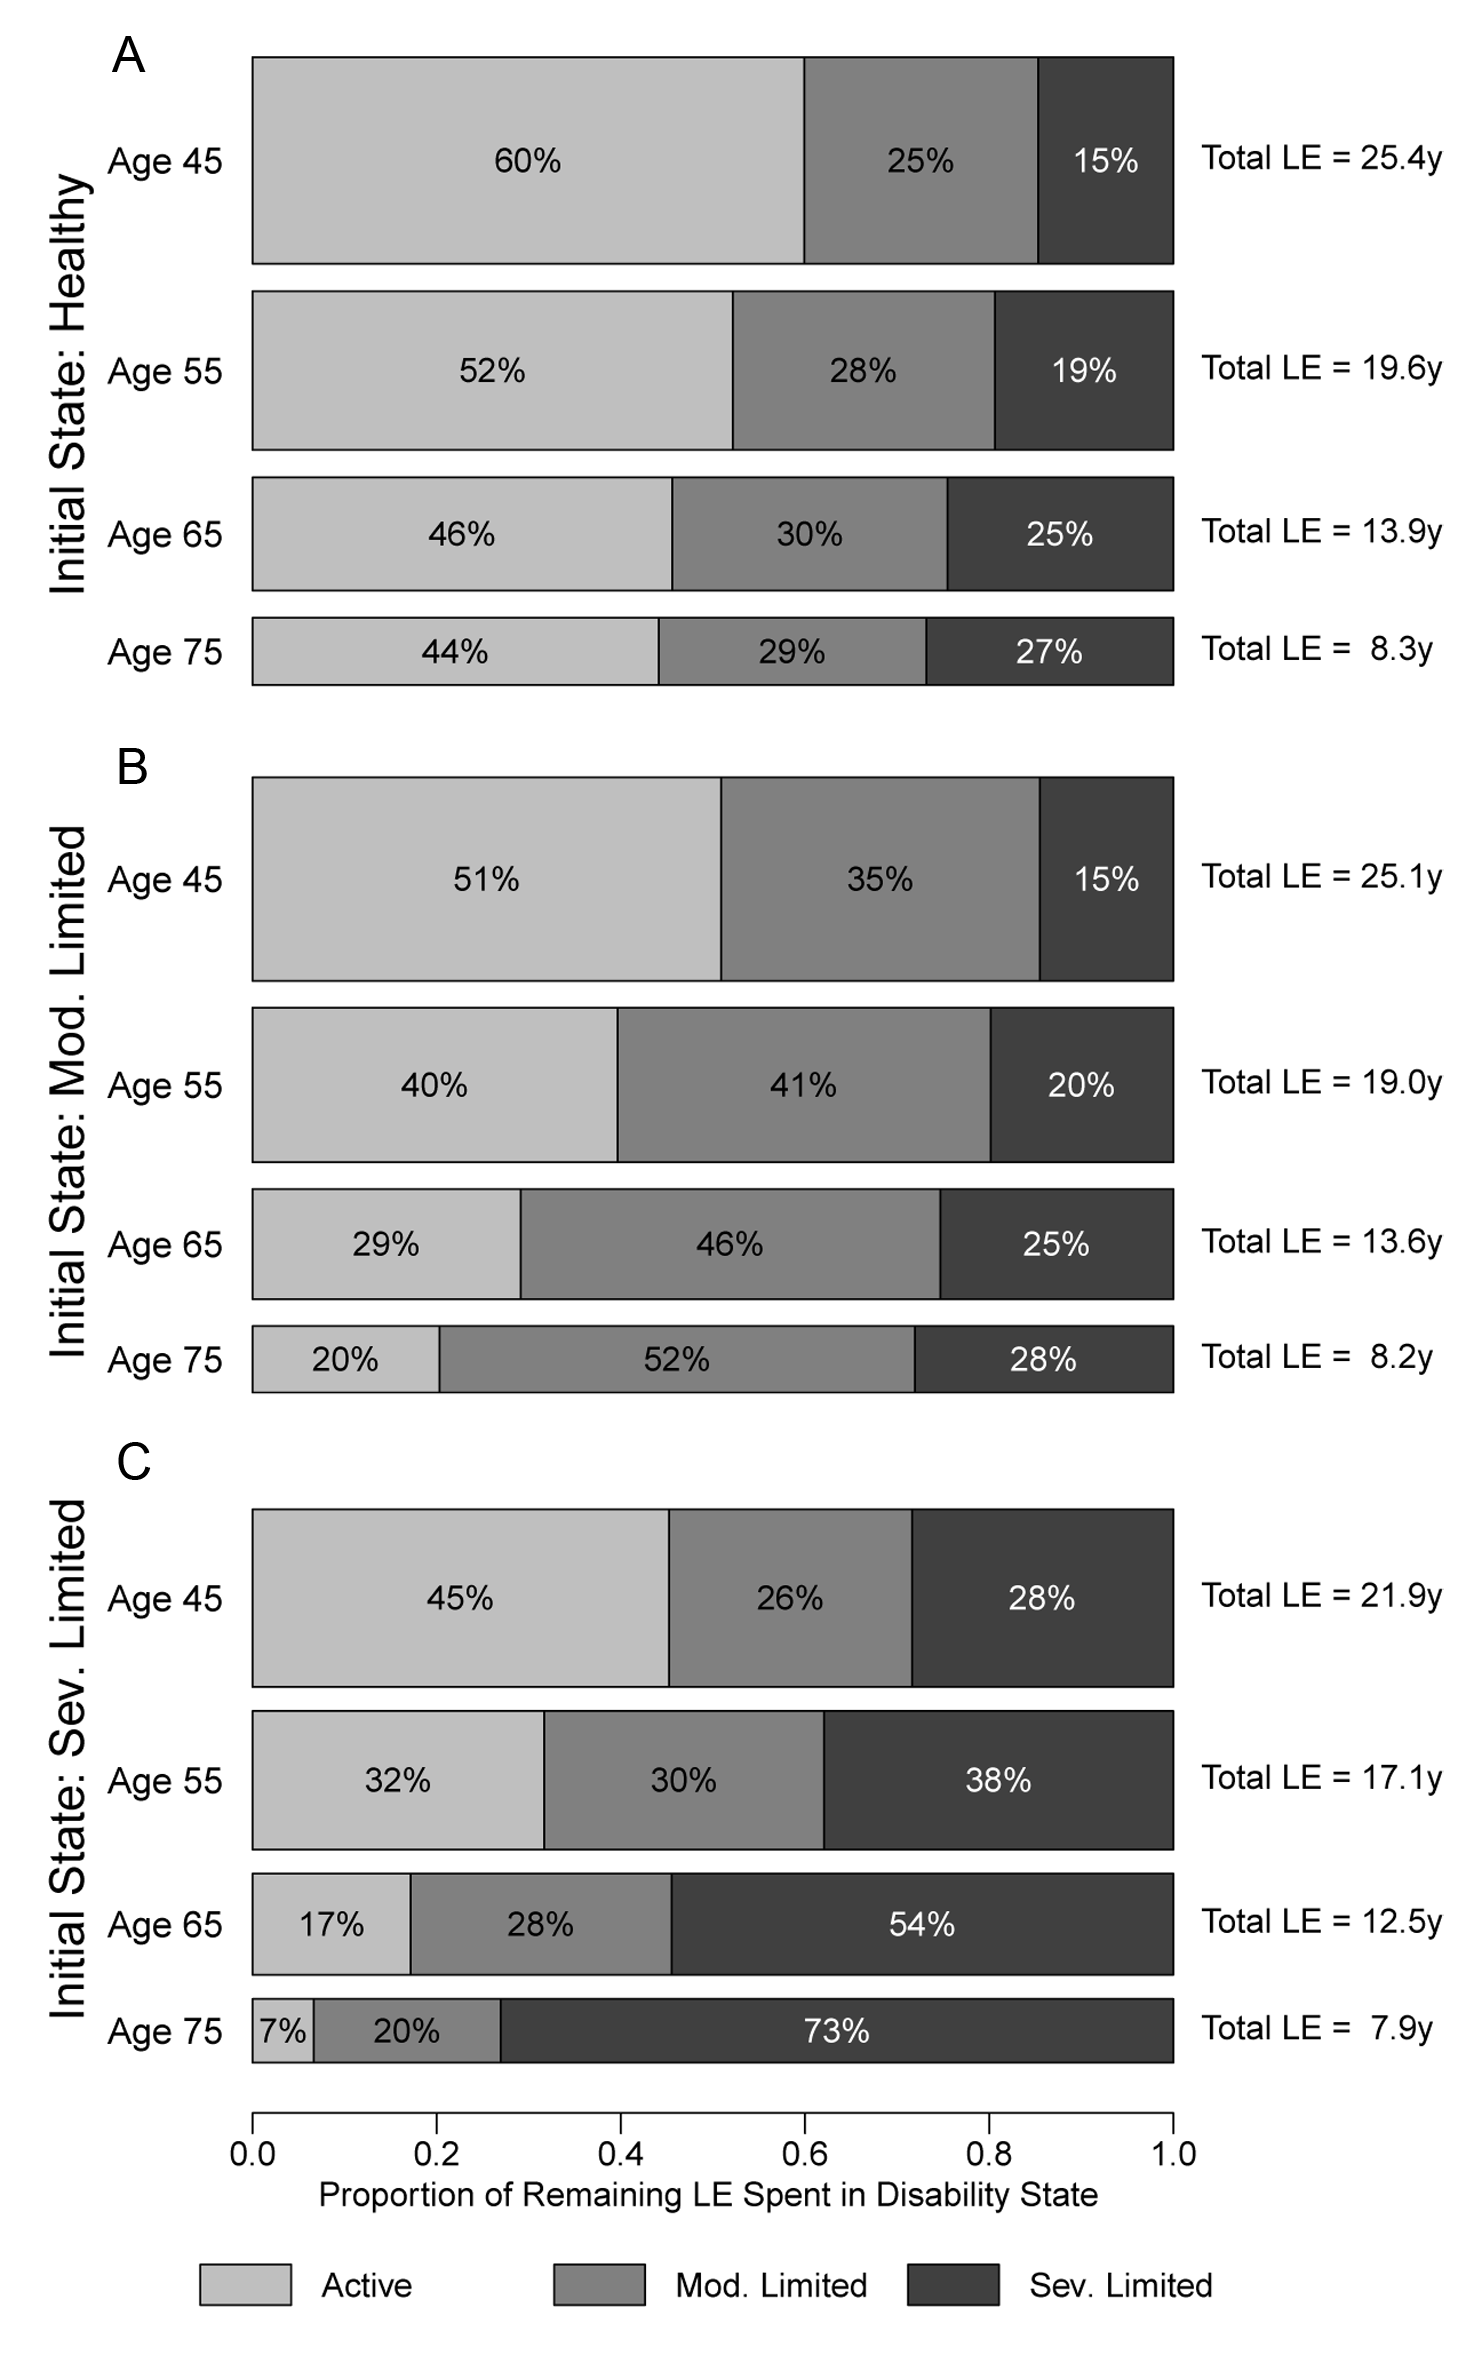

Supplement: Supplementary file 1 [file 1 › Figure_S6.tif]
